# Supplementary material for: The circadian molecular clock in the suprachiasmatic nucleus is necessary but not sufficient for fear entrainment
Source: PubMed Central journal article supplement — Proc Natl Acad Sci U S A. 2024 Mar 19;121(13):e2316841121. doi: 10.1073/pnas.2316841121 (PMC10990155; doi:10.1073/pnas.2316841121), 2024-03-19
Supplement: pnas.2316841121.sapp.pdf [file pnas.2316841121.sapp.pdf]

## Supporting Information for

The circadian molecular clock in the suprachiasmatic nucleus is necessary but not sufficient for fear entrainment

**Authors:** Ivana L. Bussi<sup>1</sup>, Miriam Ben-Hamo<sup>1</sup>, Luis E. Salazar Leon<sup>1</sup>, Leandro P. Casiraghi<sup>1</sup>, Victor Y. Zhang<sup>1</sup>, Alexandra F. Neitz<sup>1,2</sup>, Jeffrey Lee<sup>1</sup>, Joseph S. Takahashi<sup>3,4</sup>, Jeansok J. Kim<sup>5</sup>, Horacio O. de la Iglesia<sup>1,2,\*</sup>

\*Corresponding author:

Horacio de la Iglesia

horacioid@uw.edu

### This PDF file includes:

Supporting text

Figures S1 to S7

Tables S1 to S9

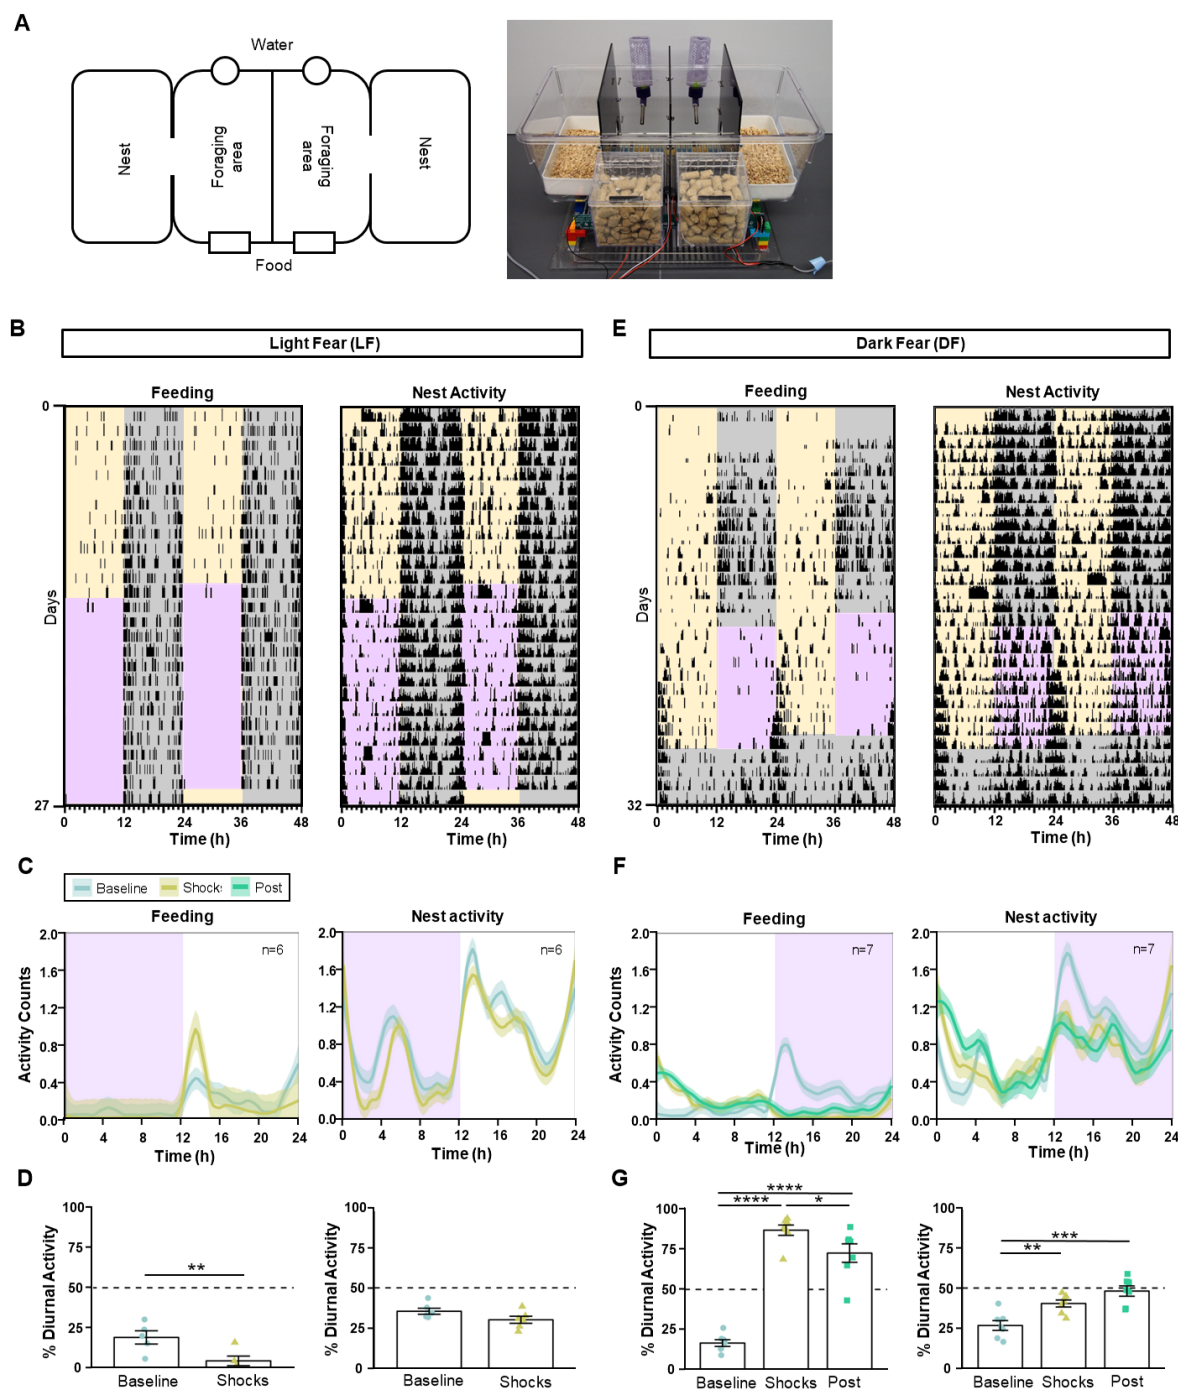

**Figure S1. Cyclic fear entrains a circadian oscillator under a light-dark cycle.** (A) Custom-build cages to study fear entrainment. Top: Schematic of a cage where two mice are individually housed. Each mouse has access to a safe nest cage and needs to get all the food and water from a foraging area. The floor of the foraging area can deliver footshocks with any temporal pattern. The shocking grid is shared by the two mice but each mouse's setup is separated by an opaque divider. Bottom: Photograph of the fear-entrainment setup. A nose poke detector continuously records feeding from each feeder. Individual IR sensors on the cage lid (not displayed) monitor the activity of each mouse independently in the nest and foraging areas. (B) Representative feeding and nest activity actograms from mice in LD subjected to LF (left) or DF (right). Yellow and grey shading respectively represents the light and dark phases of a 12:12 LD cycle. Purple shading represents the 12-h window of time at which 3 footshocks/hour randomly distributed over time were presented. (C) Average feeding and nest activity patterns from mice under an LD cycle subjected LF (left,  $n=6$ ) or DF (right,  $n=7$ ). (D) Percent of activity that took place during the daytime or extrapolated daytime across the different experimental stages from the same mice shown in B. Bars represent mean  $\pm$  SEM. \* $P < 0.05$ , \*\* $P < 0.01$ , \*\*\* $P < 0.001$ . Symbols as in Fig. 1.

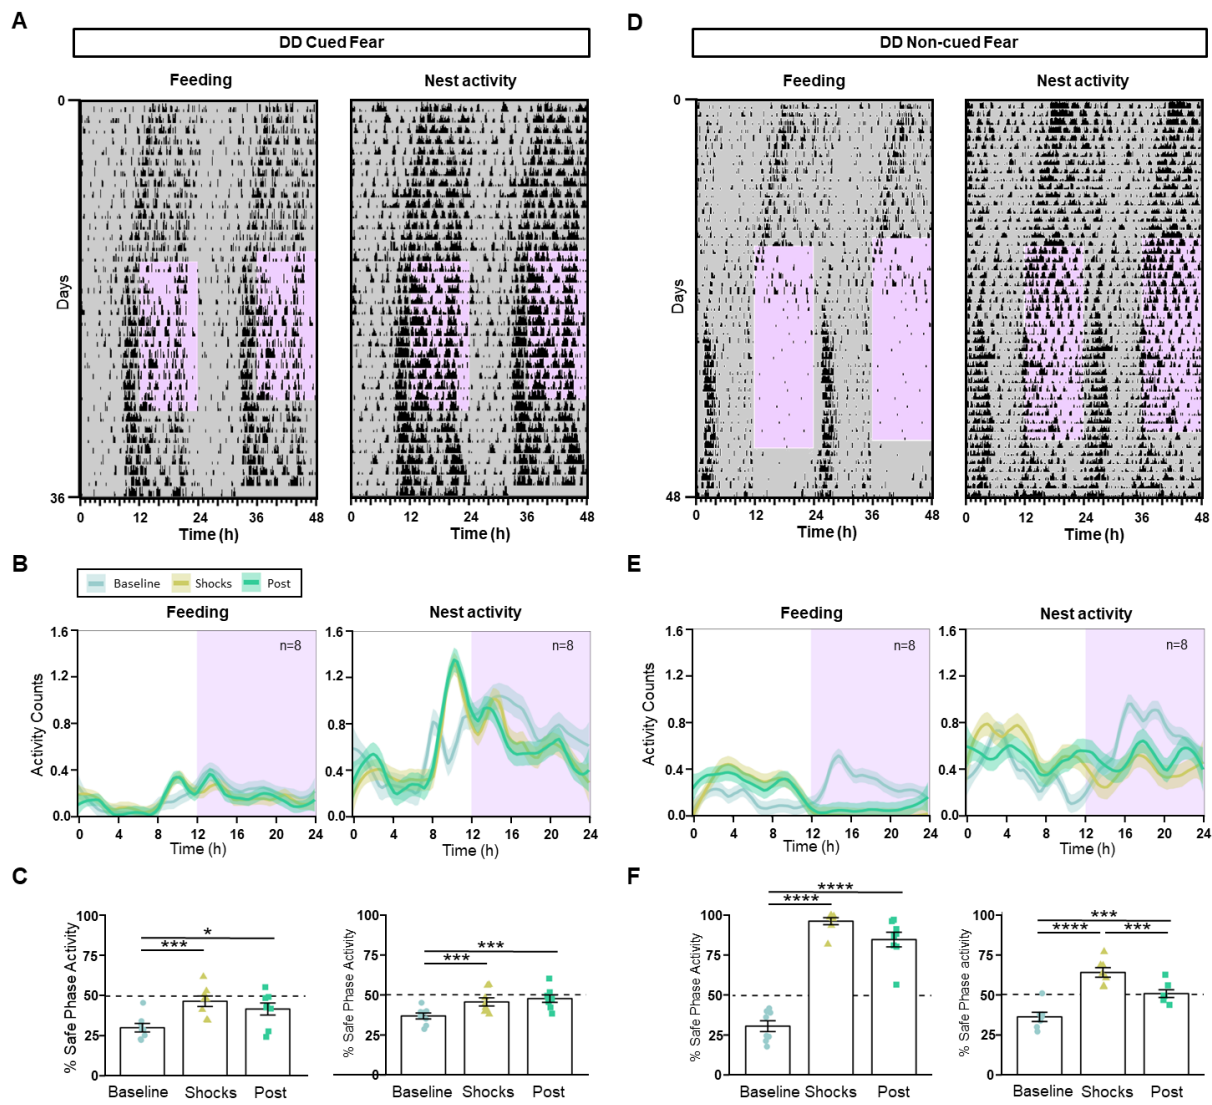

**Figure S2. Cyclic fear entrains a circadian oscillator under constant darkness.** (A, D) Representative feeding and nest activity actograms from mice in DD subjected to either cued (A) or non-cued (D) cyclic fear. Purple shading represents the 12-h window of time at which 3 footshocks/hour randomly distributed over time were presented either preceded by an auditory signal (A, cued) or not (D, non-cued). (B, E) Average feeding and nest activity patterns from mice in DD subjected to cued (B, n=8) or non-cued fear (F, n=8). (C, F) Percent of activity that took place during the safe phase (window of time without shocks) or extrapolated safe phase across the different experimental stages from the same mice shown in B, F. \* $P < 0.05$ , \*\*\* $P < 0.001$ . Symbols as in Fig. 1.

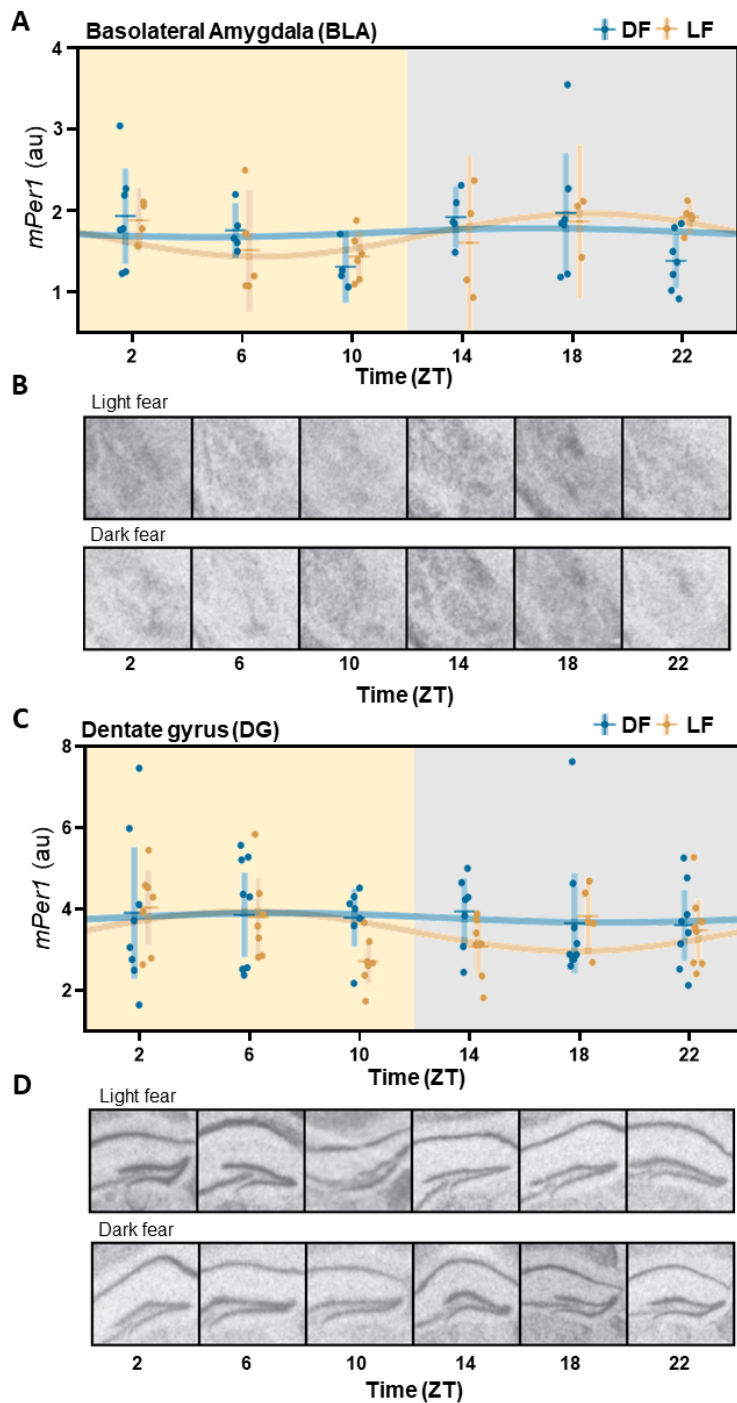

**Figure S3. *mPer1* expression in the basolateral amygdala and dentate gyrus.** (A, C) Daily pattern of *mPer1* mRNA expression in mice housed under a 12:12 LD cycle and subjected to LF or DF. Each dot represents an individual mouse, horizontal and vertical lines respectively represent the mean and SEM. Cosinor analysis failed to detect any oscillation in any of the regions or groups. (B, D) Representative autoradiographs of coronal brain sections at the level of the basolateral amygdala (B) and the dentate gyrus of the hippocampus (D), hybridized with a radioactive probe for *mPer1* mRNA detection.

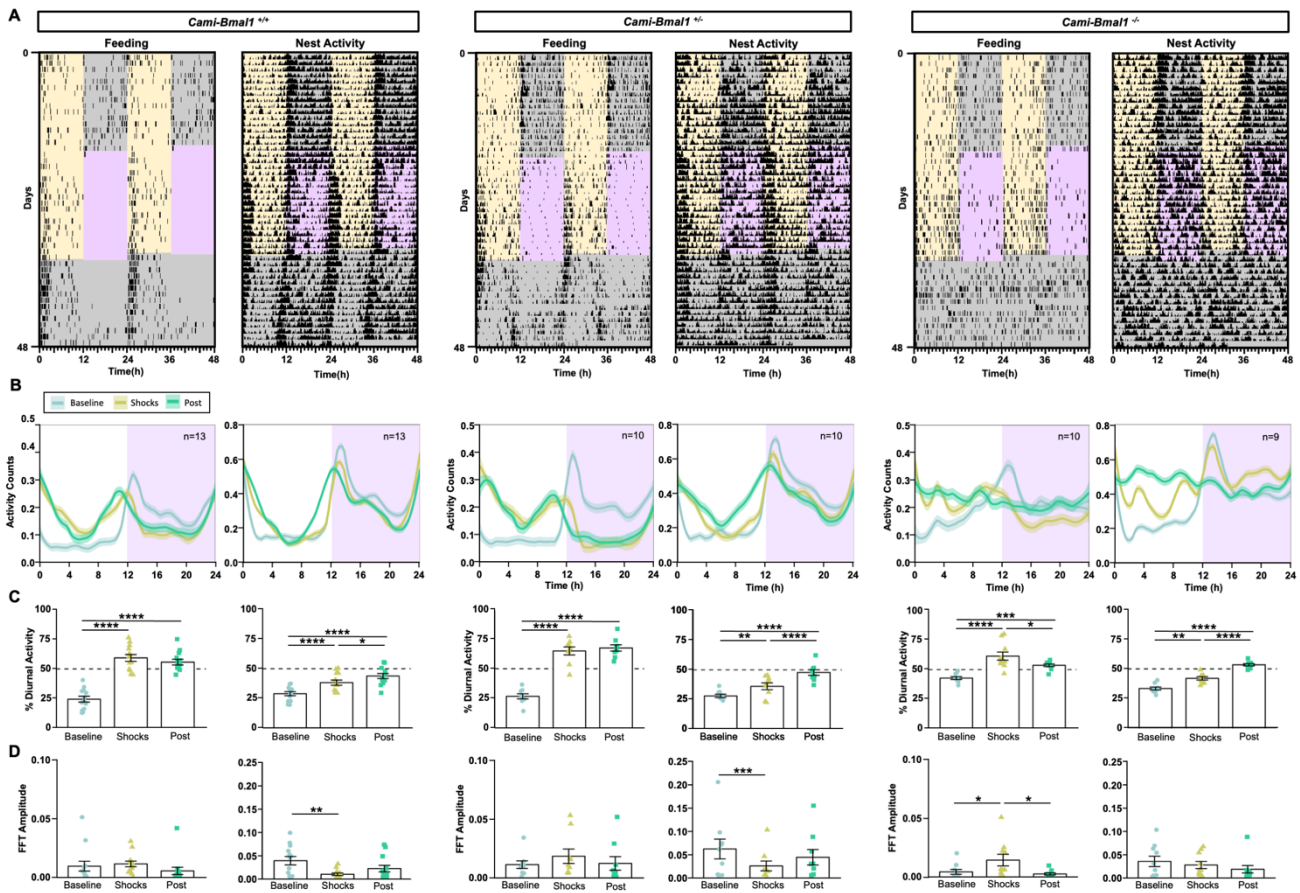

**Figure S4. The expression of the clock gene *Bmal1* in the forebrain is necessary for fear entrainment.** (A) Representative feeding and nest activity actograms from *Cami-Bmal1*<sup>+/+</sup>, *Cami-Bmal1*<sup>+/-</sup> and *Cami-Bmal1*<sup>-/-</sup> mice subjected to DF. (B) Average activity patterns from *Cami-Bmal1*<sup>+/+</sup> (left, n=13), *Cami-Bmal1*<sup>+/-</sup> (center, n=9) and *Cami-Bmal1*<sup>-/-</sup> mice (right, n=10) subjected to DF. (C) Percentage of activity during the daytime or extrapolated daytime across the different experimental stages from the same mice shown in B. (D) Fast-Fourier transform (FFT) Amplitude across the successive stages from the same mice shown in B. \*P < 0.05, \*\*P < 0.01, \*\*\*P < 0.001. Symbols as in Fig. 1.



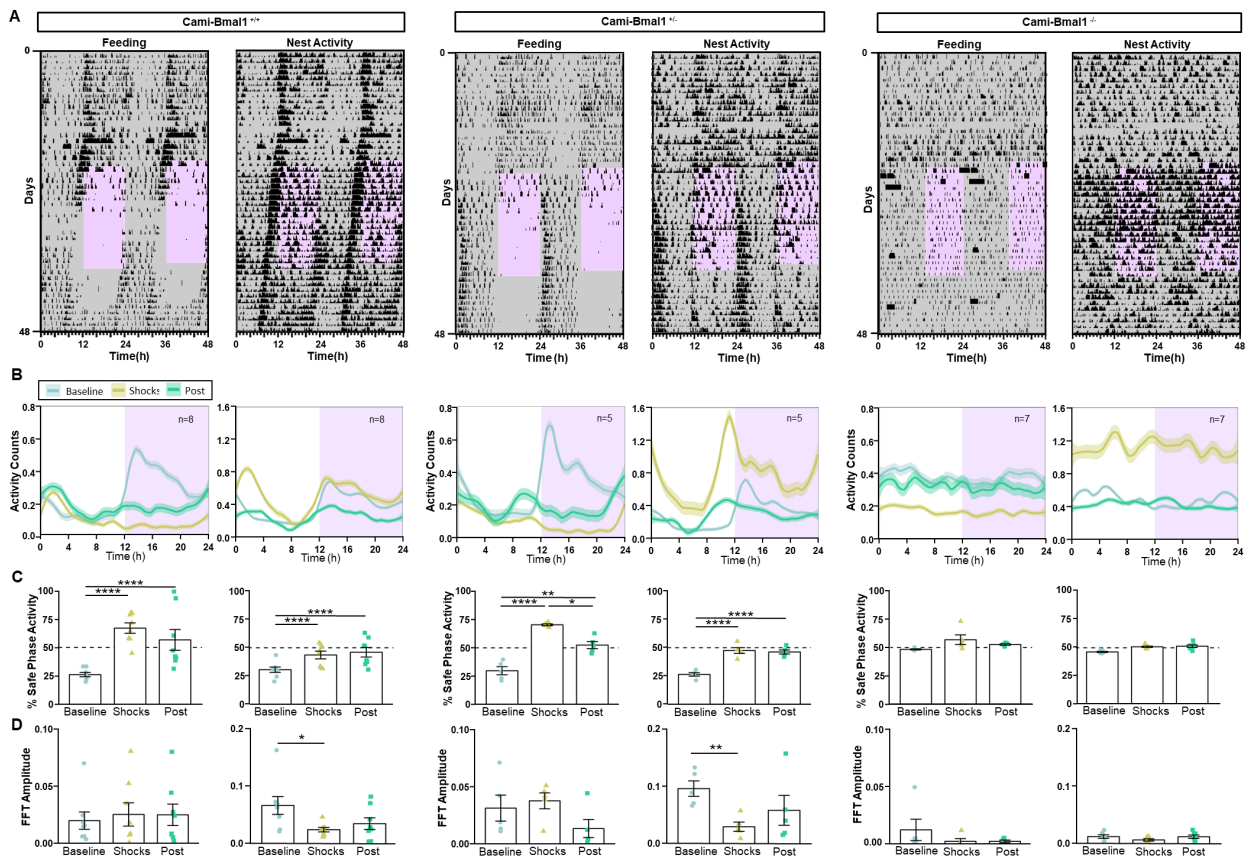

**Figure S5. The expression of the clock gene *Bmal1* in the forebrain is necessary for fear entrainment.** (A) Representative feeding and nest activity actograms from Cami-*Bmal1*<sup>+/+</sup>, Cami-*Bmal1*<sup>+/-</sup> and Cami-*Bmal1*<sup>-/-</sup> mice subjected to a non-cued fear protocol in DD. (B) Average activity patterns from Cami-*Bmal1*<sup>+/+</sup> (left, n=8), Cami-*Bmal1*<sup>+/-</sup> (center, n=5) and Cami-*Bmal1*<sup>-/-</sup> mice (right, n=7) subjected to a non-cued fear protocol in DD. (C) Percent of activity that took place during the safe phase (window of time without shocks) or extrapolated safe phase across the different experimental stages from the same mice shown in F. (D) FFT amplitude across the successive stages from the same mice shown in C. \*P < 0.05, \*\*P < 0.01, \*\*\*P < 0.001. Symbols as in Fig. 1.

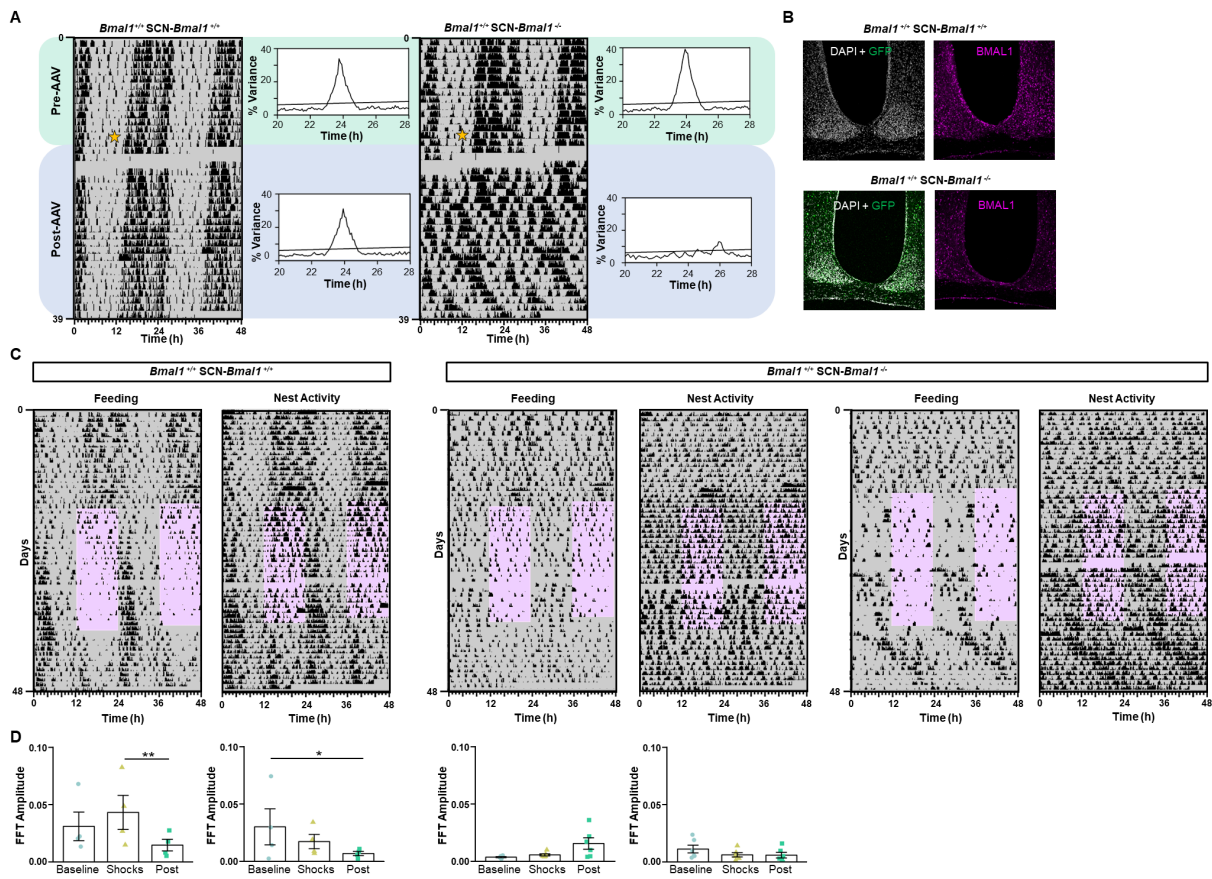

**Figure S6. The circadian canonical clock within the SCN is necessary for fear entrainment. (A)** Actograms and periodograms of cage locomotor activity of two representative mice before and after they received an injection of a Cre-expressing AAV outside (left, *SCN-Bmal1<sup>+/+</sup>*) or within (right, *SCN-Bmal1<sup>-/-</sup>*) the SCN. **(B)** Coronal sections at the level of the SCN from two representative mice displaying fluorescence for GFP (expressed by the Cre-expressing AAV) and immunostained for BMAL1. **(C)** Representative feeding and nest activity actograms from a *SCN-Bmal1<sup>+/+</sup>* control mouse (left) and two *SCN-Bmal1<sup>-/-</sup>* mice (center and right) subjected to non-cued fear in DD (same individuals shown in fig. 4B). **(D)** FFT Amplitude across the successive experimental stages from *SCN-Bmal1<sup>+/+</sup>* mice (left, n=4) and *SCN-Bmal1<sup>-/-</sup>* mice (right, n=6). \*P < 0.05, \*\*P < 0.01. Symbols as in Fig. 1.

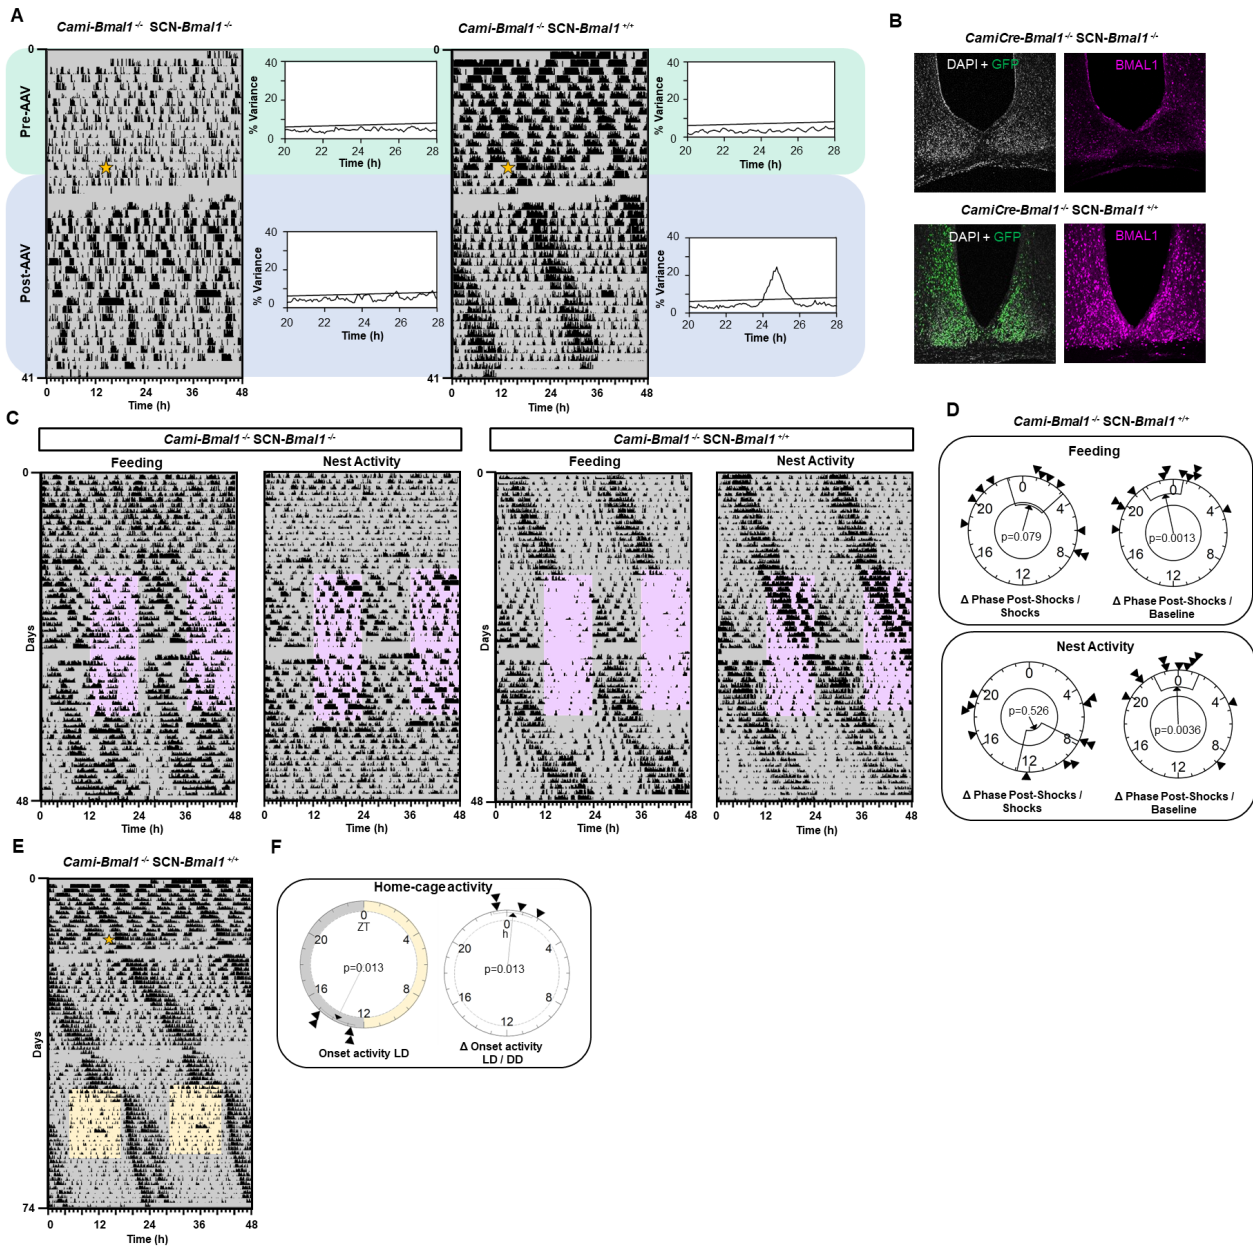

**Figure S7. The circadian canonical clock within the SCN is not sufficient for fear entrainment.** (A) Actograms and periodograms of home-cage locomotor activity of two representative mice before and after they received an injection of a *Bmal1*-expressing AAV outside (left, *Cami-Bmal1*<sup>-/-</sup> *SCN-Bmal1*<sup>-/-</sup>) or within (right, *Cami-Bmal1*<sup>-/-</sup> *SCN-Bmal1*<sup>+/+</sup>) the SCN. (B) Coronal sections at the level of the SCN of two representative mice displaying fluorescence for GFP (expressed by the *Bmal1*-expressing AAV) and immunostained for BMAL1. (C) Representative feeding and nest activity actograms from *Cami-Bmal1*<sup>-/-</sup> *SCN-Bmal1*<sup>-/-</sup> mouse (left) and *Cami-Bmal1*<sup>-/-</sup> *SCN-Bmal1*<sup>+/+</sup> mouse (right) subjected to non-cued fear protocol in DD (same individuals shown in fig. 4E). (D) Rayleigh plots representing the phase of the feeding and nest activity onset in the post-shock phase of *Cami-Bmal1*<sup>-/-</sup> *SCN-Bmal1*<sup>+/+</sup> mice relative to the shock phase (left) or to the baseline phase (right). (E) Actogram of home-cage locomotor of a *Cami-Bmal1*<sup>-/-</sup> *SCN-Bmal1*<sup>+/+</sup> mouse, showing the pattern of activity in DD before and after the viral injection to rescue *Bmal1* expression (marked by the yellow star). After this, the mouse was subjected to a 12:12 LD cycle (yellow represents light phase) and then released into DD. (F) Rayleigh plots representing the onset of activity of four *Cami-Bmal1*<sup>-/-</sup> *SCN-Bmal1*<sup>+/+</sup> mice subjected to a 12:12 LD cycle (left) and after release into DD with the phase relative to the previous onset of activity under LD conditions (i.e., 0 = no change in the phase angle of entrainment; right). Symbols as in Fig. 1.



**Table S1.** Results for the linear models with mixed effects of the percent of diurnal or safe time activity in mice entrained to fear under LD or DD conditions. Statistics correspond to Figs. 1C, G and Figs S1D, G and Fig. S2C, F.

| Experiment    | Behavior      | n | Stage    | Mean % of diurnal or safe-time activity | SEM | 95% CI |   |       | Tukey | LMM-AOV  |
|---------------|---------------|---|----------|-----------------------------------------|-----|--------|---|-------|-------|----------|
| LF            | Feeding       | 6 | Baseline | 19.3                                    | 4.1 | 7.9    | - | 30.7  | a     | 0.0079   |
|               |               |   | Shocks   | 4.8                                     | 3   | -3.4   | - | 13    | b     |          |
|               | Foraging      | 6 | Baseline | 21.4                                    | 3.3 | 12.9   | - | 29.9  | a     | 0.0006   |
|               |               |   | Shocks   | 5.4                                     | 1.5 | 1.4    | - | 9.3   | b     |          |
|               | Nest activity | 6 | Baseline | 35.6                                    | 1.9 | 30.8   | - | 40.3  | a     | 0.0999   |
|               |               |   | Shocks   | 30.3                                    | 2.2 | 24.7   | - | 35.9  | a     |          |
| DF            | Feeding       | 7 | Baseline | 17.1                                    | 2.1 | 12     | - | 22.1  | a     | 9.78E-09 |
|               |               |   | Shocks   | 86.4                                    | 3.2 | 78.6   | - | 94.1  | b     |          |
|               |               |   | Post     | 72.3                                    | 5.7 | 58.5   | - | 86.2  | c     |          |
|               | Foraging      | 7 | Baseline | 23.3                                    | 3.7 | 14.3   | - | 32.2  | a     | 1.23E-08 |
|               |               |   | Shocks   | 80.5                                    | 3.3 | 72.4   | - | 88.6  | b     |          |
|               |               |   | Post     | 68.1                                    | 4.7 | 56.7   | - | 79.5  | b     |          |
|               | Nest activity | 7 | Baseline | 27.1                                    | 3   | 19.9   | - | 34.4  | a     | 0.0003   |
|               |               |   | Shocks   | 40.6                                    | 2.1 | 35.3   | - | 45.8  | b     |          |
|               |               |   | Post     | 48.2                                    | 3.1 | 40.5   | - | 55.8  | b     |          |
| Cued Fear     | Feeding       | 8 | Baseline | 30.2                                    | 2.7 | 23.8   | - | 36.5  | a     | 0.0007   |
|               |               |   | Shocks   | 46.8                                    | 3.3 | 39     | - | 54.5  | b     |          |
|               |               |   | Post     | 41.9                                    | 3.8 | 32.9   | - | 50.8  | b     |          |
|               | Foraging      | 8 | Baseline | 33.2                                    | 2.8 | 26.7   | - | 39.8  | a     | 0.0011   |
|               |               |   | Shocks   | 43.4                                    | 3   | 36.2   | - | 50.6  | b     |          |
|               |               |   | Post     | 41.2                                    | 2.8 | 34.6   | - | 47.9  | b     |          |
|               | Nest activity | 8 | Baseline | 36.9                                    | 1.8 | 32.5   | - | 41.3  | a     | 0.0001   |
|               |               |   | Shocks   | 45.6                                    | 2.5 | 39.6   | - | 51.5  | b     |          |
|               |               |   | Post     | 47.6                                    | 2.3 | 42.2   | - | 53    | b     |          |
| Non-cued Fear | Feeding       | 8 | Baseline | 30.9                                    | 3.4 | 22.9   | - | 38.8  | a     | 2.01E-11 |
|               |               |   | Shocks   | 96.4                                    | 2.2 | 91.3   | - | 101.6 | b     |          |
|               |               |   | Post     | 84.9                                    | 4.6 | 74.1   | - | 95.7  | b     |          |
|               | Foraging      | 8 | Baseline | 30.5                                    | 2.2 | 25.2   | - | 35.8  | a     | 3.75E-11 |
|               |               |   | Shocks   | 94.6                                    | 3.1 | 87.3   | - | 101.9 | b     |          |
|               |               |   | Post     | 78.7                                    | 3.7 | 69.9   | - | 87.5  | c     |          |
|               | Nest activity | 8 | Baseline | 36.2                                    | 2.8 | 29.3   | - | 43.2  | a     | 5.33E-07 |
|               |               |   | Shocks   | 63.5                                    | 2.9 | 56.3   | - | 70.7  | b     |          |
|               |               |   | Post     | 50.5                                    | 2.4 | 44.7   | - | 56.3  | c     |          |

**Table S2.** Results for Rayleigh statistics on the phase of mice entrained to fear under LD or DD conditions. Statistics correspond to Figs. 1D, H.

| Condition | Treatment     | Stage    | n | Rayleigh statistics |         |           |                  |      |
|-----------|---------------|----------|---|---------------------|---------|-----------|------------------|------|
|           |               |          |   | r                   | p       | Phase (h) | Fiduciary Limits | SEM  |
| LD        | LF            | Baseline | 6 | 0.99                | 0.0003  | 12.0      | 11.93 - 12.15    | 0.05 |
|           |               | Shocks   | 6 | 0.99                | 0.0003  | 12.1      | 12.04 - 12.18    | 0.03 |
|           |               | -        | - | -                   | -       | -         | -                | -    |
|           | DF            | Baseline | 7 | 0.99                | 0.0001  | 11.9      | 11.66 - 12.18    | 0.13 |
|           |               | Shocks   | 7 | 0.92                | 0.0006  | 0.4       | 23.36 - 1.53     | 0.55 |
|           |               | Post     | 7 | 0.99                | 0.0001  | 23.0      | 22.55 - 23.42    | 0.22 |
| DD        | Cued Fear     | Baseline | 8 | 0.87                | 0.0007  | 10.1      | 8.83 - 11.40     | 0.68 |
|           |               | Shocks   | 8 | 0.87                | 0.0008  | 9.5       | 8.16 - 10.81     | 0.70 |
|           |               | Post     | 8 | 0.86                | 0.0009  | 9.4       | 7.99 - 10.71     | 0.71 |
|           | Non-cued Fear | Baseline | 8 | 0.97                | <0.0001 | 14.2      | 13.54 - 14.81    | 0.33 |
|           |               | Shocks   | 8 | 0.85                | 0.001   | 2.1       | 0.77 - 3.52      | 0.72 |
|           |               | Post     | 8 | 0.82                | 0.002   | 2.0       | 0.47 - 3.54      | 0.81 |

**Table S3.** Cosinor analysis for w4-h clock gene expression in the SCN, dentate gyrus (DG) and basolateral amygdala (BLA)

|                          | DF       |        |   |       | LF       |        |   |       | Wald tests      |         |
|--------------------------|----------|--------|---|-------|----------|--------|---|-------|-----------------|---------|
|                          | Estimate | CI 95% |   |       | Estimate | CI 95% |   |       | Mean Difference | p-value |
| <b>SCN <i>mPer1</i></b>  |          |        |   |       |          |        |   |       |                 |         |
| Mean (au)                | 3.42     | 3.11   | - | 3.73  | 3.59     | 3.31   | - | 4.21  | -               | -       |
| Amplitude (au)           | 1.67     | 1.22   | - | 2.13  | 1.86     | 1.42   | - | 2.3   | 0.19            | 0.5609  |
| Acrophase (ZT)           | 1.24     | 1      | - | 1.49  | 1.2      | 0.96   | - | 1.45  | -0.04           | 0.8166  |
| <b>SCN <i>mBmal1</i></b> |          |        |   |       |          |        |   |       |                 |         |
| Mean (au)                | 1.89     | 1.82   | - | 1.97  | 1.93     | 1.86   | - | 2.07  | -               | -       |
| Amplitude (au)           | 0.18     | 0.08   | - | 0.29  | 0.23     | 0.12   | - | 0.34  | 0.05            | 0.5112  |
| Phase (ZT)               | 12.67    | 12.11  | - | 13.22 | 12.78    | 12.35  | - | 13.21 | 0.12            | 0.7466  |
| <b>DG <i>mPer1</i></b>   |          |        |   |       |          |        |   |       |                 |         |
| Mean (au)                | 3.78     | 3.46   | - | 4.1   | 3.45     | 2.97   | - | 3.92  | -               | -       |
| Amplitude (au)           | 0.12     | -0.33  | - | 0.56  | 0.48     | 0      | - | 0.96  | 0.37            | 0.2725  |
| Acrophase (ZT)           | -1.03    | -5.02  | - | 2.97  | 0.16     | -0.88  | - | 1.21  | 1.19            | 0.5724  |
| <b>BLA <i>mPer1</i></b>  |          |        |   |       |          |        |   |       |                 |         |
| Mean (au)                | 2.06     | 1.92   | - | 2.21  | 2.04     | 1.82   | - | 2.25  | -               | -       |
| Amplitude (au)           | 0.05     | -0.15  | - | 0.25  | 0.23     | 0.01   | - | 0.45  | 0.18            | 0.2347  |
| Phase (ZT)               | 13.3     | 8.77   | - | 17.82 | 11.39    | 10.3   | - | 12.47 | -1.91           | 0.4208  |

**Table S4.** Results for the linear models with mixed effects of the percent of diurnal activity in mice lacking expression of *Bmal1* in the forebrain, and their genetic controls, subjected to DF. Statistics correspond to Figs. 3C and Figs S4C.

| Behavior      | Genotype                        | n  | Stage    | Mean % of diurnal activity | SEM | CI 95% |        | Tukey | LMEM-AOV   |                 |
|---------------|---------------------------------|----|----------|----------------------------|-----|--------|--------|-------|------------|-----------------|
| Feeding       | <i>Cami-Bmal</i> <sup>+/+</sup> | 13 | Baseline | 24.2                       | 2.5 | 18.8   | - 29.6 | a     |            |                 |
|               |                                 |    | Shocks   | 59.2                       | 2.9 | 52.9   | - 65.5 | b     |            |                 |
|               |                                 |    | Post     | 55.7                       | 2.4 | 50.5   | - 60.9 | b     |            |                 |
|               | <i>Cami-Bmal</i> <sup>+/-</sup> | 9  | Baseline | 26.7                       | 2.1 | 21.9   | - 31.5 | a     | Stage:     | <b>2.20E-16</b> |
|               |                                 |    | Shocks   | 64.9                       | 3.3 | 57.1   | - 72.6 | b     | Gen:       | <b>0.0362</b>   |
|               |                                 |    | Post     | 67.4                       | 2.6 | 61.3   | - 73.5 | b     | Stage*Gen: | <b>2.42E-08</b> |
|               | <i>Cami-Bmal</i> <sup>-/-</sup> | 10 | Baseline | 42.7                       | 1.2 | 40     | - 45.5 | a     |            |                 |
|               |                                 |    | Shocks   | 61.5                       | 3.5 | 53.7   | - 69.3 | b     |            |                 |
|               |                                 |    | Post     | 53.7                       | 1.1 | 51.2   | - 56.2 | c     |            |                 |
| Foraging      | <i>Cami-Bmal</i> <sup>+/+</sup> | 13 | Baseline | 20.5                       | 1.7 | 16.9   | - 24.2 | a     |            |                 |
|               |                                 |    | Shocks   | 53.5                       | 4.2 | 44.5   | - 62.6 | b     |            |                 |
|               |                                 |    | Post     | 54.6                       | 3.4 | 47.3   | - 61.9 | b     |            |                 |
|               | <i>Cami-Bmal</i> <sup>+/-</sup> | 9  | Baseline | 19.6                       | 2.2 | 14.5   | - 24.7 | a     | Stage:     | <b>2.00E-16</b> |
|               |                                 |    | Shocks   | 56.6                       | 5.9 | 43     | - 70.1 | b     | Gen:       | 0.3236          |
|               |                                 |    | Post     | 67.2                       | 3.6 | 58.8   | - 75.6 | c     | Stage*Gen: | <b>3.15E-02</b> |
|               | <i>Cami-Bmal</i> <sup>-/-</sup> | 10 | Baseline | 26.6                       | 1.3 | 23.5   | - 29.6 | a     |            |                 |
|               |                                 |    | Shocks   | 56.2                       | 3.4 | 48.5   | - 63.9 | b     |            |                 |
|               |                                 |    | Post     | 54.7                       | 0.5 | 53.6   | - 55.9 | b     |            |                 |
| Nest activity | <i>Cami-Bmal</i> <sup>+/+</sup> | 13 | Baseline | 28.8                       | 1.7 | 25     | - 32.5 | a     |            |                 |
|               |                                 |    | Shocks   | 38.2                       | 2.2 | 33.4   | - 42.9 | b     |            |                 |
|               |                                 |    | Post     | 43.7                       | 2.1 | 39.2   | - 48.3 | c     |            |                 |
|               | <i>Cami-Bmal</i> <sup>+/-</sup> | 9  | Baseline | 27.9                       | 1.4 | 24.7   | - 31.2 | a     | Stage:     | <b>2.00E-16</b> |
|               |                                 |    | Shocks   | 36.1                       | 2.9 | 29.4   | - 42.8 | b     | Gen:       | <b>0.0162</b>   |
|               |                                 |    | Post     | 47.7                       | 2.4 | 42.2   | - 53.2 | c     | Stage*Gen: | 0.2123          |
|               | <i>Cami-Bmal</i> <sup>-/-</sup> | 9  | Baseline | 33.5                       | 1.3 | 30.6   | - 36.4 | a     |            |                 |
|               |                                 |    | Shocks   | 42                         | 1.4 | 38.7   | - 45.2 | b     |            |                 |
|               |                                 |    | Post     | 53.4                       | 0.9 | 51.3   | - 55.5 | c     |            |                 |

**Table S5.** Results for the linear models with mixed effects of the amplitude of the fast-Fourier transform (FFT) in mice lacking expression of *Bmal1* in the forebrain, and their genetic controls, subjected to DF. Statistics correspond to Figs. 3D and Figs S4D.

| Behavior      | Genotype                        | n  | Stage    | Mean FFT amplitude | SEM    | CI 95%  |   |        | Tukey | LMEM-AOV   |                 |
|---------------|---------------------------------|----|----------|--------------------|--------|---------|---|--------|-------|------------|-----------------|
| Feeding       | <i>Cami-Bmal</i> <sup>+/+</sup> | 13 | Baseline | 0.0096             | 0.0042 | 0.0006  | - | 0.0187 | a     |            |                 |
|               |                                 |    | Shocks   | 0.0116             | 0.0024 | 0.0064  | - | 0.0168 | a     |            |                 |
|               |                                 |    | Post     | 0.0056             | 0.0031 | -0.0011 | - | 0.0123 | a     |            |                 |
|               | <i>Cami-Bmal</i> <sup>+/-</sup> | 9  | Baseline | 0.0112             | 0.0032 | 0.0038  | - | 0.0185 | a     | Stage:     | <b>0.0021</b>   |
|               |                                 |    | Shocks   | 0.0182             | 0.0061 | 0.0042  | - | 0.0322 | a     | Gen:       | 0.3426          |
|               |                                 |    | Post     | 0.0122             | 0.0057 | -0.001  | - | 0.0254 | a     | Stage*Gen: | 0.5382          |
|               | <i>Cami-Bmal</i> <sup>-/-</sup> | 10 | Baseline | 0.0044             | 0.002  | -0.0002 | - | 0.009  | a     |            |                 |
|               |                                 |    | Shocks   | 0.0144             | 0.005  | 0.0032  | - | 0.0257 | b     |            |                 |
|               |                                 |    | Post     | 0.0027             | 0.0009 | 0.0006  | - | 0.0048 | a     |            |                 |
| Foraging      | <i>Cami-Bmal</i> <sup>+/+</sup> | 13 | Baseline | 0.034              | 0.0079 | 0.0168  | - | 0.0512 | a     |            |                 |
|               |                                 |    | Shocks   | 0.026              | 0.005  | 0.0152  | - | 0.0368 | a     |            |                 |
|               |                                 |    | Post     | 0.0158             | 0.004  | 0.0071  | - | 0.0245 | a     |            |                 |
|               | <i>Cami-Bmal</i> <sup>+/-</sup> | 9  | Baseline | 0.0697             | 0.0223 | 0.0183  | - | 0.121  | a     | Stage:     | <b>0.001</b>    |
|               |                                 |    | Shocks   | 0.0341             | 0.0089 | 0.0135  | - | 0.0546 | b     | Gen:       | 0.0907          |
|               |                                 |    | Post     | 0.0353             | 0.0169 | -0.0037 | - | 0.0742 | b     | Stage*Gen: | 0.2316          |
|               | <i>Cami-Bmal</i> <sup>-/-</sup> | 10 | Baseline | 0.0287             | 0.0101 | 0.0059  | - | 0.0516 | a     |            |                 |
|               |                                 |    | Shocks   | 0.0294             | 0.0096 | 0.0077  | - | 0.051  | a     |            |                 |
|               |                                 |    | Post     | 0.0053             | 0.0011 | 0.0027  | - | 0.0079 | a     |            |                 |
| Nest activity | <i>Cami-Bmal</i> <sup>+/+</sup> | 13 | Baseline | 0.04               | 0.0088 | 0.0207  | - | 0.0592 | a     |            |                 |
|               |                                 |    | Shocks   | 0.0114             | 0.0027 | 0.0055  | - | 0.0173 | b     |            |                 |
|               |                                 |    | Post     | 0.0234             | 0.0068 | 0.0086  | - | 0.0381 | a,b   |            |                 |
|               | <i>Cami-Bmal</i> <sup>+/-</sup> | 9  | Baseline | 0.0622             | 0.0211 | 0.0134  | - | 0.1109 | a     | Stage:     | <b>3.69E-05</b> |
|               |                                 |    | Shocks   | 0.026              | 0.0105 | 0.0018  | - | 0.0502 | b     | Gen:       | 0.3173          |
|               |                                 |    | Post     | 0.0444             | 0.0165 | 0.0065  | - | 0.0824 | a,b   | Stage*Gen: | 0.1487          |
|               | <i>Cami-Bmal</i> <sup>-/-</sup> | 10 | Baseline | 0.0357             | 0.011  | 0.0108  | - | 0.0607 | a     |            |                 |
|               |                                 |    | Shocks   | 0.028              | 0.0077 | 0.0107  | - | 0.0453 | a     |            |                 |
|               |                                 |    | Post     | 0.019              | 0.0078 | 0.0013  | - | 0.0367 | a     |            |                 |



**Table S6.** Results for the linear models with mixed effects of the percent of activity during the safe phase in mice lacking expression of *Bmal1* in the forebrain, and their genetic controls, subjected to non-cued fear under DD. Statistics correspond to Figs. 3G and Figs S5C.

| Behavior      | Genotype                       | n | Stage    | Mean % of safe-time activity | SEM | CI 95% |   |      | Tukey | LMEM-AOV   |                 |
|---------------|--------------------------------|---|----------|------------------------------|-----|--------|---|------|-------|------------|-----------------|
| Feeding       | <i>Cami-Bmal<sup>+/+</sup></i> | 8 | Baseline | 26.4                         | 1.9 | 22     | - | 30.8 | a     |            |                 |
|               |                                |   | Shocks   | 66.8                         | 4.5 | 56.1   | - | 77.5 | b     |            |                 |
|               |                                |   | Post     | 56.6                         | 9   | 35.2   | - | 77.9 | b     |            |                 |
|               | <i>Cami-Bmal<sup>+/-</sup></i> | 5 | Baseline | 29.9                         | 3.5 | 20.1   | - | 39.8 | a     | Stage:     | <b>1.56E-08</b> |
|               |                                |   | Shocks   | 70.3                         | 0.8 | 68     | - | 72.6 | b     | Gen:       | 0.8596          |
|               |                                |   | Post     | 52.5                         | 3.1 | 43.8   | - | 61.1 | c     | Stage*Gen: | <b>0.0052</b>   |
|               | <i>Cami-Bmal<sup>-/-</sup></i> | 5 | Baseline | 48.4                         | 0.5 | 46.9   | - | 49.8 | a     |            |                 |
|               |                                |   | Shocks   | 57                           | 4.3 | 45.1   | - | 68.9 | a     |            |                 |
|               |                                |   | Post     | 52.7                         | 0.7 | 50.9   | - | 54.5 | a     |            |                 |
| Foraging      | <i>Cami-Bmal<sup>+/+</sup></i> | 8 | Baseline | 23.2                         | 1.5 | 19.7   | - | 26.6 | a     |            |                 |
|               |                                |   | Shocks   | 71.8                         | 3.4 | 63.8   | - | 79.9 | b     |            |                 |
|               |                                |   | Post     | 63.5                         | 7.3 | 46.2   | - | 80.8 | b     |            |                 |
|               | <i>Cami-Bmal<sup>+/-</sup></i> | 5 | Baseline | 25                           | 2   | 19.5   | - | 30.5 | a     | Stage:     | <b>4.82E-14</b> |
|               |                                |   | Shocks   | 69.9                         | 3.2 | 60.9   | - | 78.8 | b     | Gen:       | 0.66            |
|               |                                |   | Post     | 55.9                         | 2.8 | 48     | - | 63.7 | c     | Stage*Gen: | <b>8.50E-08</b> |
|               | <i>Cami-Bmal<sup>-/-</sup></i> | 7 | Baseline | 46.8                         | 0.7 | 45.1   | - | 48.5 | a     |            |                 |
|               |                                |   | Shocks   | 52                           | 1.6 | 48     | - | 56   | a     |            |                 |
|               |                                |   | Post     | 51.3                         | 0.8 | 49.4   | - | 53.2 | a     |            |                 |
| Nest activity | <i>Cami-Bmal<sup>+/+</sup></i> | 8 | Baseline | 30.9                         | 2.4 | 25.3   | - | 36.5 | a     |            |                 |
|               |                                |   | Shocks   | 43.7                         | 3.4 | 35.7   | - | 51.7 | b     |            |                 |
|               |                                |   | Post     | 46.1                         | 4.2 | 36.3   | - | 56   | b     |            |                 |
|               | <i>Cami-Bmal<sup>+/-</sup></i> | 5 | Baseline | 26.9                         | 1.5 | 22.7   | - | 31   | a     | Stage:     | <b>2.10E-11</b> |
|               |                                |   | Shocks   | 47.6                         | 2.5 | 40.7   | - | 54.5 | b     | Gen:       | <b>0.0082</b>   |
|               |                                |   | Post     | 46.3                         | 1.8 | 41.4   | - | 51.2 | b     | Stage*Gen: | <b>0.0006</b>   |
|               | <i>Cami-Bmal<sup>-/-</sup></i> | 7 | Baseline | 46.3                         | 0.5 | 45.1   | - | 47.6 | a     |            |                 |
|               |                                |   | Shocks   | 50.9                         | 0.6 | 49.4   | - | 52.4 | a     |            |                 |
|               |                                |   | Post     | 51.4                         | 1.1 | 48.7   | - | 54.1 | a     |            |                 |

**Table S7.** Results for the linear models with mixed effects of the amplitude of the fast-Fourier transform (FFT) in mice lacking expression of *Bmal1* in the forebrain, and their genetic controls, subjected to non-cued fear in DD. Statistics correspond to Figs. 3H and Figs S5D.

| Behavior      | Genotype                        | n | Stage    | Mean FFT amplitude | SEM    | CI 95%  |   |        | Tukey | LMEM-AOV   |                 |
|---------------|---------------------------------|---|----------|--------------------|--------|---------|---|--------|-------|------------|-----------------|
| Feeding       | <i>Cami-Bmal</i> <sup>+/+</sup> | 8 | Baseline | 0.0203             | 0.0077 | 0.0021  | - | 0.0384 | a     |            |                 |
|               |                                 |   | Shocks   | 0.0257             | 0.0103 | 0.0014  | - | 0.05   | a     |            |                 |
|               |                                 |   | Post     | 0.0254             | 0.0094 | 0.0031  | - | 0.0477 | a     |            |                 |
|               | <i>Cami-Bmal</i> <sup>+/-</sup> | 5 | Baseline | 0.0321             | 0.0116 | 0       | - | 0.0642 | a     | Stage:     | 0.3582          |
|               |                                 |   | Shocks   | 0.0385             | 0.0071 | 0.0189  | - | 0.0581 | a     | Gen:       | 0.0801          |
|               |                                 |   | Post     | 0.0139             | 0.0081 | -0.0085 | - | 0.0363 | a     | Stage*Gen: | 0.3425          |
|               | <i>Cami-Bmal</i> <sup>-/-</sup> | 5 | Baseline | 0.0127             | 0.0092 | -0.0129 | - | 0.0383 | a     |            |                 |
|               |                                 |   | Shocks   | 0.0028             | 0.0024 | -0.0037 | - | 0.0093 | a     |            |                 |
|               |                                 |   | Post     | 0.0028             | 0.0011 | -0.0003 | - | 0.0059 | a     |            |                 |
| Foraging      | <i>Cami-Bmal</i> <sup>+/+</sup> | 8 | Baseline | 0.0639             | 0.0124 | 0.0345  | - | 0.0932 | a     |            |                 |
|               |                                 |   | Shocks   | 0.0906             | 0.0205 | 0.0423  | - | 0.139  | a     |            |                 |
|               |                                 |   | Post     | 0.0712             | 0.019  | 0.0263  | - | 0.1162 | a     |            |                 |
|               | <i>Cami-Bmal</i> <sup>+/-</sup> | 5 | Baseline | 0.0778             | 0.0204 | 0.0212  | - | 0.1344 | a     | Stage:     | 0.0996          |
|               |                                 |   | Shocks   | 0.0782             | 0.0085 | 0.0547  | - | 0.1017 | a     | Gen:       | <b>0.0003</b>   |
|               |                                 |   | Post     | 0.0325             | 0.009  | 0.0074  | - | 0.0576 | b     | Stage*Gen: | 0.1088          |
|               | <i>Cami-Bmal</i> <sup>-/-</sup> | 7 | Baseline | 0.0066             | 0.002  | 0.0017  | - | 0.0116 | a     |            |                 |
|               |                                 |   | Shocks   | 0.0039             | 0.0009 | 0.0018  | - | 0.006  | a     |            |                 |
|               |                                 |   | Post     | 0.0076             | 0.0025 | 0.0016  | - | 0.0136 | a     |            |                 |
| Nest activity | <i>Cami-Bmal</i> <sup>+/+</sup> | 8 | Baseline | 0.0675             | 0.0157 | 0.0304  | - | 0.1045 | a     |            |                 |
|               |                                 |   | Shocks   | 0.025              | 0.0039 | 0.0158  | - | 0.0342 | b     |            |                 |
|               |                                 |   | Post     | 0.0356             | 0.0102 | 0.0114  | - | 0.0598 | a,b   |            |                 |
|               | <i>Cami-Bmal</i> <sup>+/-</sup> | 5 | Baseline | 0.0985             | 0.0136 | 0.0607  | - | 0.1363 | a     | Stage:     | <b>0.0004</b>   |
|               |                                 |   | Shocks   | 0.0311             | 0.0082 | 0.0083  | - | 0.0539 | b     | Gen:       | <b>3.84E-06</b> |
|               |                                 |   | Post     | 0.0601             | 0.0264 | -0.0131 | - | 0.1333 | a,b   | Stage*Gen: | 0.113           |
|               | <i>Cami-Bmal</i> <sup>-/-</sup> | 7 | Baseline | 0.0128             | 0.0032 | 0.0051  | - | 0.0206 | a     |            |                 |
|               |                                 |   | Shocks   | 0.007              | 0.002  | 0.002   | - | 0.012  | a     |            |                 |
|               |                                 |   | Post     | 0.0126             | 0.0031 | 0.0051  | - | 0.0201 | a     |            |                 |

**Table S8.** Results for the linear models with mixed effects of the amplitude of the fast-Fourier transform (FFT) in mice with targeted deletion of *Bmall* to the SCN, and their controls, subjected to non-cued fear in DD. Statistics correspond to Figs. 4C and Figs S6D.

| Behavior      | Genotype                        | n | Stage    | Mean FFT amplitude | SEM    | CI 95%           | Tukey | LMM-AOV    |                 |
|---------------|---------------------------------|---|----------|--------------------|--------|------------------|-------|------------|-----------------|
| Feeding       | <i>SCN-Bmall</i> <sup>-/-</sup> | 6 | Baseline | 0.0043             | 0.0005 | 0.0030 - 0.0055  | a     | Stage:     | 0.100676        |
|               |                                 |   | Shocks   | 0.0062             | 0.0009 | 0.0039 - 0.0086  | a     |            |                 |
|               |                                 |   | Post     | 0.0160             | 0.0049 | 0.0034 - 0.0286  | a     | Gen:       | <b>0.039836</b> |
|               | <i>SCN-Bmall</i> <sup>+/+</sup> | 4 | Baseline | 0.0308             | 0.0122 | -0.0081 - 0.0697 | a,b   | Stage*Gen: | <b>0.000897</b> |
|               |                                 |   | Shocks   | 0.0427             | 0.0145 | -0.0035 - 0.0890 | a     |            |                 |
|               |                                 |   | Post     | 0.0148             | 0.0049 | -0.0009 - 0.0305 | b     |            |                 |
| Foraging      | <i>SCN-Bmall</i> <sup>-/-</sup> | 6 | Baseline | 0.0068             | 0.0026 | 0.0001 - 0.0135  | a     | Stage:     | 0.053748        |
|               |                                 |   | Shocks   | 0.0112             | 0.0049 | -0.0014 - 0.0238 | a     |            |                 |
|               |                                 |   | Post     | 0.0154             | 0.0071 | -0.0027 - 0.0336 | a     | Gen:       | <b>0.005911</b> |
|               | <i>SCN-Bmall</i> <sup>+/+</sup> | 4 | Baseline | 0.0510             | 0.0127 | 0.0104 - 0.0916  | a     | Stage*Gen: | <b>0.007886</b> |
|               |                                 |   | Shocks   | 0.0595             | 0.0151 | 0.0115 - 0.1075  | a     |            |                 |
|               |                                 |   | Post     | 0.0221             | 0.0064 | 0.0017 - 0.0425  | b     |            |                 |
| Nest activity | <i>SCN-Bmall</i> <sup>-/-</sup> | 6 | Baseline | 0.0115             | 0.0033 | 0.0029 - 0.0201  | a     | Stage:     | 0.05212         |
|               |                                 |   | Shocks   | 0.0066             | 0.0018 | 0.0019 - 0.0112  | a     |            |                 |
|               |                                 |   | Post     | 0.0063             | 0.0024 | 0.0001 - 0.0125  | a     | Gen:       | 0.10213         |
|               | <i>SCN-Bmall</i> <sup>+/+</sup> | 4 | Baseline | 0.0306             | 0.0157 | -0.0194 - 0.0807 | a     | Stage*Gen: | 0.27096         |
|               |                                 |   | Shocks   | 0.0178             | 0.0062 | -0.0021 - 0.0376 | a,b   |            |                 |
|               |                                 |   | Post     | 0.0073             | 0.0018 | 0.0015 - 0.0131  | b     |            |                 |

**Table S9.** Results for Raleigh statistics on the phase of mice with restricted expression of *Bmall* to the SCN (*Cami-Bmall*<sup>-/-</sup> *SCN-Bmall*<sup>+/+</sup>) subjected to non-cued fear under DD, and to a 12:12 LD cycle followed by DD. Statistics correspond to Fig. 4F and S7 D. and F.

| Behavior           | Stage           | n  | Rayleigh statistics |        |           |                  |      |
|--------------------|-----------------|----|---------------------|--------|-----------|------------------|------|
|                    |                 |    | r                   | p      | Phase (h) | Fiduciary Limits | SEM  |
| Feeding            | Post/ Baseline  | 11 | 0.73                | 0.0013 | 0.80      | 21.68 - 0.72     | 0.84 |
|                    | Post/Shocks     | 11 | 0.48                | 0.079  | 1.02      | 25.11 - 3.16     | 1.18 |
| Foraging           | Post/ Baseline  | 11 | 0.69                | 0.0029 | 0.60      | 22.98 - 2.23     | 0.89 |
|                    | Post/Shocks     | 11 | 0.03                | 0.988  | 18.3      | 15.4 - 21.2      | 1.60 |
| Nest activity      | Post/ Baseline  | 11 | 0.68                | 0.0036 | 0.15      | 22.2 - 1.51      | 0.91 |
|                    | Post/Shocks     | 11 | 0.24                | 0.526  | 10.29     | 7.73 - 12.86     | 1.41 |
| Home-cage activity | LD              | 4  | 0.96                | 0.0128 | 10.24     | -11.45 - (-9.04) | 0.51 |
| Home-cage activity | Δ Onset LD - DD | 4  | 0.96                | 0.129  | 0.39      | -0.83 - 1.62     | 0.52 |
